# Supplementary material for: Symplectite and kelyphite formation during decompression of mafic granulite from Gjelsvikfjella, central Dronning Maud Land, Antarctica
Source: Copernicus journal article supplement (doi:10.5194/ejm-35-969-2023), 2023-11-14
Supplement: Supplementary file 1 [file ejm-35-969-2023-supplement.zip]

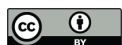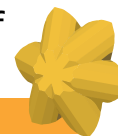

*Supplement of*

## **Symplectite and kelyphite formation during decompression of mafic granulite from Gjelsvikfjella, central Dronning Maud Land, Antarctica**

**Synnøve Elvevold et al.**

*Correspondence to:* Synnøve Elvevold (elvevold@npolar.no)

- [ejm-35-969-2023-supplement-title-page.pdf](#)
- [Supplemental data tables S1...S10.xlsx](#)

The copyright of individual parts of the supplement might differ from the article licence.
