# Supplementary material for: Symplectite and kelyphite formation during decompression of mafic granulite from Gjelsvikfjella, central Dronning Maud Land, Antarctica
Source: Copernicus journal article supplement (doi:10.5194/ejm-35-969-2023), 2023-11-14
Supplement: Supplementary file 2 [file ejm-35-969-2023-supplement.zip]

Archive with 2 entries (2 files):
- Supplemental data tables S1...S10.xlsx
- ejm-35-969-2023-supplement-title-page.pdf
