# Supplementary material for: Symplectite and kelyphite formation during decompression of mafic granulite from Gjelsvikfjella, central Dronning Maud Land, Antarctica
Source: Copernicus journal article supplement (doi:10.5194/ejm-35-969-2023), 2023-11-14
Supplement: Supplementary file 2 [file ejm-35-969-2023-supplement.zip › Supplemental data tables S1...S10.xlsx]

## Sheet: S1 GrtChem
Table S1 Representative microprobe garnet analyses (formula calculated
on the basis of 12 oxygens)
Sample	NP03016A	NP03016A	NP03016B	NP03016B	NP03971
Anal. No.	48	40	19	20	95
Position	core	rim	core	rim	rim
SiO2	37.548	36.9329	37.8963	37.3771	37.5469
TiO2	0.0756	0.0492	0.1399	0.1213	0.032
Al2O3	21.1323	21.1443	20.7264	20.6222	21.0958
FeO	28.3135	31.1402	28.8327	30.8746	31.5796
MnO	0.5179	1.1062	0.5324	1.1886	1.2789
MgO	3.5814	1.909	3.3271	1.7696	1.7502
CaO	8.9192	7.9271	8.9824	8.3677	7.5313
Cr2O3	0.008	0.0016	0.0322	0	0
Total	100.096	100.21	100.47	100.32	100.81
Si	2.9723	2.96171	2.99514	2.99365	2.99183
Al	1.97164	1.99846	1.93071	1.94672	1.98121
Ti	0.00450044	0.00296702	0.00831505	0.00730605	0.00191751
Fe3+	0.110866	0.107657	0.0901981	0.0768107	0.0477516
Fe2+	1.75489	1.97138	1.80841	1.98462	2.05249
Mn	0.0347254	0.0751374	0.0356413	0.0806353	0.0863164
Mg	0.42257	0.228178	0.391945	0.211256	0.207869
Ca	0.75648	0.681096	0.760639	0.71807	0.64298
Cr	0.000500708	0.000101446	0.00201217	0	0
Xgrs	0.254822	0.230428	0.253831	0.23979	0.215069
Xsps	0.0116973	0.0254204	0.0118938	0.0269271	0.0288717
Xalm	0.591137	0.666955	0.60348	0.662737	0.68653
Xprp	0.142344	0.0771969	0.130795	0.0705461	0.0695294
Fe/(Fe+Mg)	0.805934	0.896262	0.821872	0.903794	0.908037

## Sheet: S2 CpxChem
Table S2 Representative microprobe clinopyroxene analyses (formula calculated on the basis of 4
cations
Sample	NP03016A	NP03016A	NP03016A	NP03016A	NP03971	NP03971	NP03971	NP03971
Anal. No.	6	32	49	58	43	53	62	67
Position	pl-cpx intergr	matrix	corona	rim symp	incl grt	ilm-cpx symp	matrix	pl-cpx intergr
SiO2	50.9401	50.5075	50.7084	50.8586	51.539	50.9862	50.546	51.4092
TiO2	0.1304	0.1214	0.0714	0.3185	0.1959	0.1142	0.1367	0.0967
Al2O3	0.9932	0.9549	0.8413	0.729	1.3917	0.7296	1.0145	0.791
FeO	17.9366	19.6393	19.0841	17.9772	13.951	18.5056	18.3188	18.4132
MnO	0.2216	0.1957	0.2454	0.2498	0.087	0.2897	0.2202	0.1934
MgO	7.908	8.0325	7.7994	8.1328	10.1862	7.6057	7.603	7.7518
CaO	21.7092	19.8301	20.9305	21.7872	22.0029	21.6883	21.764	21.9067
Na2O	0.1903	0.1784	0.1823	0.181	0.2192	0.2021	0.2344	0.2025
Cr2O3	0.0134	0.0235	-0.0166	0.0169	-0.0187	0.005	0.0234	0.0084
Total	100.043	99.4833	99.8462	100.251	99.5542	100.126	99.861	100.773
Si	1.98165	1.98266	1.98248	1.97445	1.9778	1.98731	1.973	1.98871
AlIV	0.0183485	0.0173352	0.0175153	0.0255473	0.0222041	0.0126903	0.0269965	0.011291
AlVI	0.0271899	0.0268447	0.021251	0.00780946	0.0407414	0.0208272	0.0196766	0.0247736
Ti	0.0038148	0.00358376	0.0020992	0.00929862	0.00565336	0.00334738	0.00401269	0.00281309
Fe3+	0	0	0.00639777	0.0122461	0	0.000287483	0.0163123	0
Fe2+	0.583542	0.644739	0.617576	0.571426	0.447729	0.602939	0.58169	0.595696
Mn	0.00730183	0.00650697	0.00812641	0.00821427	0.00282787	0.00956436	0.00728036	0.00633696
Mg	0.458536	0.469984	0.454496	0.47061	0.582635	0.441866	0.442349	0.446963
Ca	0.90485	0.834034	0.876748	0.906252	0.904671	0.90574	0.910217	0.907972
Na	0.0143535	0.0135781	0.0138187	0.0136243	0.0163094	0.0152732	0.0177399	0.0151882
Cr	0.000412155	0.000729373	-0.000513129	0.000518749	-0.000567382	0.000154089	0.00072218	0.00025692
Jd	1.43535	1.35781	0.742097	0.137818	1.63094	1.49857	0.142761	1.51882
Ac	0	0	0.639777	1.22461	0	0.0287483	1.63123	0
Aug	98.5646	98.6422	98.6181	98.6376	98.3691	98.4727	98.226	98.4812
pl-cpx interg: plagioclase-clinopyroxene intergrowth, corona: corona surrounding garnet,
rim symp: outer rim surrounding ilmenite-clinopyroxene symplectite, incl grt: inclusion in garnet,
ilm-cpx symp: ilmenite-clinopyroxene symplectite

## Sheet: S3 OpxChem
Table S3 Representative microprobe orthopyroxene analyses (formula calculated on the basis of
4 cations
Sample	NP03016A	NP03016A	NP03016A	NP03016B	NP03016B	NP03971	NP03971	NP03971
Anal. No.	2	63	69	3	22	75	100	56
Position	ilm-opx symp	corona	repl cpx	ilm-opx symp	corona	matrix	corona	ilm-opx symp
SiO2	48.5449	48.2004	49.055	48.2475	49.1778	48.6385	48.3556	48.7499
TiO2	0.7123	0.0841	0.0455	0.7159	0.0631	0.074	0.0812	0.1025
Al2O3	0.2623	0.4247	0.3902	0.3424	0.4251	0.3451	0.3837	0.4098
FeO	39.8328	39.6089	40.2368	39.7983	39.4987	41.0603	41.1273	40.5207
MnO	0.5234	0.4173	0.5051	0.4446	0.4754	0.5695	0.5265	0.5058
MgO	9.3043	9.7494	9.3539	9.6007	9.6087	9.1472	8.8617	8.7759
CaO	0.5588	0.7053	0.5706	0.5105	0.7074	0.738	0.7011	0.7409
NaO	0.026	0.0306	0	0.0408	-0.0106	0.0072	0.0152	0.0263
Cr2O3	0	0.0151	0.0391	-0.0275	0.0046	0.0543	0.0211	-0.0015
Total	99.7648	99.2358	100.196	99.6732	99.9502	100.634	100.073	99.8303
Si	1.98898	1.9754	1.99914	1.97404	2.00266	1.9771	1.97944	1.99896
AlIV	0.0110245	0.0246031	0.000858688	0.0259591	-0.00266066	0.0229042	0.0205603	0.0010371
AlVI	0.00164199	-0.00408867	0.0178835	-0.00944748	0.0230641	-0.00637065	-0.00204797	0.018768
Ti	0.021947	0.00259195	0.00139443	0.0220272	0.00193239	0.00226207	0.00249964	0.00316069
Fe3+	0	0.0254501	0	0	0	0.023573	0.0181325	0
Fe2+	1.36487	1.33212	1.37135	1.36179	1.3452	1.37226	1.38983	1.38954
Mn	0.0181641	0.0144859	0.0174354	0.015408	0.016398	0.0196081	0.0182553	0.0175673
Mg	0.568209	0.595553	0.568188	0.585495	0.583233	0.55421	0.540694	0.536366
Ca	0.0245306	0.0309701	0.0249148	0.0223791	0.0308652	0.0321417	0.0307497	0.0325504
Na	0.00206543	0.00243151	0	0.00323663	-0.000836943	0.000567455	0.0012064	0.00209093
Cr	0	0.000489293	0.00125987	-0.000889615	0.00014811	0.00174516	0.000682914	-4.86307e-05
En	0.71	0.69	0.71	0.7	0.7	0.71	0.72	0.72
ilm-opx symp: ilmenite-orthopyroxene symplectite, corona: corona surrounding garnet, repl cpx:
replacing clinopyroxene,

## Sheet: S4 PlChem
Table S4 Representative microprobe plagioclase analyses (formula calculated on the basis of 5 cations)
Sample	NP03016A	NP03016A	NP03016A	NP03016B	NP03016B	NP03971	NP03971	NP03971	NP03971	NP03972	NP03972
Anal. No.	9	53	54	13	14	69	70	97	98	119	126
Position	pl-cpx intergr	corona	corona	pl-cpx intergr	pl-cpx intergr	pl-cpx intergr	pl-cpx intergr	corona	corona	corona	matrix rim
SiO2	48.8853	52.8678	55.369	53.4377	48.8416	48.5607	57.0856	51.7939	56.0533	58.0367	58.7148
Al2O3	32.932	29.9636	28.6017	29.8119	32.6296	32.7095	27.4509	30.8499	28.0719	27.0201	26.6703
CaO	16.0465	12.7758	10.9058	12.7687	16.104	16.2411	9.5592	14.0472	10.187	9.0187	8.5404
Na2O	2.6134	4.503	5.3832	4.5515	2.5699	2.4308	6.2224	3.7798	5.9241	6.6252	6.884
K2O	0.0438	0.0895	0.0986	0.0756	0.0438	0.0506	0.1176	0.0824	0.1057	0.112	0.1239
Total	100.521	100.2	100.358	100.645	100.189	99.9927	100.436	100.553	100.342	100.813	100.933
Si	2.22175	2.38752	2.48676	2.40328	2.22833	2.22161	2.55083	2.34068	2.50966	2.57862	2.6025
Al	1.76404	1.59486	1.51402	1.58023	1.75459	1.76372	1.44572	1.6432	1.48135	1.41496	1.3933
Ca	0.78138	0.618172	0.524796	0.615274	0.787206	0.796093	0.457658	0.680172	0.488681	0.429333	0.405589
Na	0.23029	0.394285	0.46877	0.396883	0.22733	0.215618	0.539093	0.331195	0.514266	0.570736	0.59161
K	0.00253947	0.00515622	0.00564933	0.00433741	0.00254927	0.00295315	0.00670369	0.00475054	0.00603728	0.00634827	0.00700594
An	0.770433	0.607473	0.525208	0.60529	0.773982	0.784588	0.456082	0.669383	0.48433	0.426595	0.403891
Ab	0.227063	0.38746	0.469138	0.390443	0.223511	0.212501	0.537237	0.325942	0.509687	0.567097	0.589133
Or	0.00250389	0.00506698	0.00565377	0.00426703	0.00250645	0.00291047	0.00668061	0.00467519	0.00598352	0.00630779	0.00697661
pl-cpx intergr: plagioclase-clinopyroxene intergrowth, corona: corona surrounding garnet, matrix rim: rim of matrix grain

## Sheet: S5 AmpChem
Table S5 Representative microprobe amphibole analyses (formula calculated on the basis of 24 oxygens (Locock, 2014)).
Sample	NP03016A	NP03016A	NP03016C	NP03971	NP03971	NP03972	NP03972
Anal. No.	16	70	79	44	105	120	122
Position	repl pyroxene	matrix	matrix	incl garnet	matrix	matrix	matrix
SiO2	44.7614	51.21	41.953	43.97	45.98	41.9088	50.0353
TiO2	0.8957	0.07	1.9556	1.94	0.14	1.762	0.1371
Al2O3	8.2862	0.23	10.3287	10.93	8.41	11.4622	1.3578
FeO	22.8811	33.21	23.8129	17	23.38	24.3848	35.2044
MnO	0.1015	0.27	0.3165	0.06	0.09	0.1906	0.7871
MgO	7.1451	10.71	5.6454	9.67	6.97	5.1192	8.4605
CaO	11.1562	0.63	11.0413	11.51	11.28	11.0556	1.5409
Na2O	0.8187	0.04	1.4549	1.46	0.85	1.4057	0.0575
K2O	0.5191	0	1.1389	0.92	0.48	0.9855	0.1022
Cr2O3	0.0577	0	0	0	0	0.02	0.0169
Total	96.6227	96.37	97.6472	97.46	97.58	98.2944	97.6997
T-site
Si	6.876	7.98	6.515	6.592	6.99	6.457	7.804
Al	1.124	0.02	1.485	1.408	1.01	1.543	0.196
Sum T	8	8	8	8	8	8	8
C-site
Al (C)	0.377	0.022	0.406	0.522	0.497	0.539	0.054
Ti (C)	0.104	0.008	0.228	0.219	0.016	0.204	0.016
Cr (C)	0.00696731	0	0	0	0	0.002	0
Fe3+ (C)	0.362	0	0.133	0.071	0.31	0.154	0.089
Fe2+ (C)	2.515	2.483	2.926	2.026	2.598	2.925	2.874
Mg (C)	1.636	2.487	1.307	2.162	1.579	1.176	1.967
Sum C	5.00097	5	5	5	5	5	5
B-site
Fe2+ (B)	0.063	1.844	0.034	0.033	0.065	0.063	1.63
Mn (B)	0.01313	0.035	0.042	0.007	0.011	0.025	0.104
Ca (B)	1.836	0.105	1.837	1.849	1.837	1.825	0.258
Na (B)	0.087	0.013	0.087	0.111	0.087	0.087	0.009
Sum B	1.99913	1.997	2	2	2	2	2.001
A-site
Na (A)	0.157	0	0.351	0.313	0.165	0.333	0.009
K (A)	0.102	0	0.226	0.175	0.093	0.194	0.02
Sum A	0.259	0	0.577	0.488	0.258	0.527	0.029
Classification (Hawthorne et al. 2012)	ferro-hornblende	grunerite	ferro-pargasite	magnesio-hornblende	ferro-hornblende	ferro-pargasite	grunerite
repl pyroxene: replacing pyroxene
incl garnet: inclusion in garnet
Locock, A.J.: An Excel spreadsheet to classify chemical analyses of amphiboles following the IMA 2012 recommendations, Comput.
Geosci., 62, 1‒11, 2014.

## Sheet: S6 AddChem
Table S6 Representative microprobe analyses of additional phases
Sample	NP03972	NP03016C	NP03016A
Anal. No.	134	86	1
Position	bt matrix	bt matrix	ilm
SiO2	35.1934	35.7091	0.0149
TiO2	3.9747	4.8089	52.4221
Al2O3	14.6151	14.063	0.026
FeO	26.7843	23.5788	46.9
MnO	0.0403	0.0545	0.3818
MgO	6.3378	8.363	0.1307
CaO	0.1019	0	0.049
Na2O	0.0564	0.1105
K2O	8.8137	9.1798
Cr2O3	0.0323	0.0679	0
Total	95.9176	95.8676	99.9245
Si	5.53403	5.54152	0
AlIV	2.46597	2.45848
AlVI	0.242695	0.113697	0.001
Ti	0.470014	0.561206	0.995
Fe2+	3.52229	3.0601	0.981
Mn	0.00536759	0.00716375	0.008
Mg	1.48545	1.93442	0.005
Ca	0.017168	0
Na	0.0171954	0.0332479
K	1.76804	1.81734
Cr	0.00401579	0.00833121	0
Fe/(Fe+Mg)	0.7	0.61	0.995

## Sheet: S7 WRChem
Table S7 Whole rock major elements (wt%)
Sample	NP03971A	NP03971B	NP03071	NP03072	NP03083	NP03085	NP03086
Rock type	mafic pod	mafic pod	granulite	granulite	metagabbro	granulite	metagabbro
SiO2	52.1	49.2	49.7	48.1	50.7	54.2	57.4
Al2O3	12.9	13.8	12.9	13.1	15.1	13.7	13.6
Fe2O3	17.9	19.7	21.1	22.7	12	13.7	12.9
TiO2	2.96	3.29	2.83	3.04	2.09	2.55	2.12
MgO	2.66	2.91	2.79	2.82	5.92	2.21	1.68
CaO	7.81	8.38	8.19	8.67	7.02	6.3	5.31
Na2O	1.7	1.67	0.48	0.99	3.01	2.05	2.55
K2O	0.326	0.167	0.885	0.307	1.46	2.61	2.46
MnO	0.301	0.323	0.285	0.333	0.183	0.209	0.193
P2O5	0.939	1	0.481	0.629	0.477	0.822	0.63
L.O.I.	-0.225	-0.555	-0.854	-0.957	0.459	0.08	0.105
Total	99.3	99.8	98.8	99.7	98.5	98.5	99

## Sheet: S8 TraceChem
Table S8 Trace element compositions (μg/g)
Sample	NP03971A	NP03971B	NP03071	NP03072	NP03083	NP03085	NP03086
Rock type	mafic pod	mafic pod	granulite	granulite	metagabbro	granulite	metagabbro
Be	<1	<1	<1	<1	1.3	1.3	2.1
Y	98.7	96.8	62.5	75.4	43.1	85.1	85.3
Zr	975	917	404	503	233	547	986
Nb	61.3	63.4	16.9	24	14	35.6	37.3
Cs	3.57	1.09	<0.4	<0.4	2.36	1.66	1.29
Ba	60.4	24.8	265	23	535	1360	1250
La	66	67	48.1	47.3	26.4	48.7	55
Ce	174	174	95.2	112	65	108	144
Pr	23.2	24.4	11.5	15.3	8.7	17.7	18.2
Nd	109	124	48	66.6	40.2	83.4	84.3
Sm	25.8	29.3	10.9	14.5	9.11	20.7	20.3
Eu	5.2	5.68	2.85	4.14	2.44	4.09	3.32
Gd	23	25.8	10.5	13.4	8.22	19.7	18.3
Tb	3.5	3.75	1.72	2.16	1.31	3.01	2.92
Dy	18.6	19.7	10.5	12.5	7.63	16.9	16.6
Ho	3.75	3.65	2.33	2.75	1.56	3.44	3.33
Er	9.97	9.23	6.26	7.42	4.34	8.62	8.8
Tm	1.38	1.3	0.952	1.08	0.564	1.15	1.19
Yb	8.96	8.16	6.2	7.2	3.77	7.63	7.53
Lu	1.33	1.16	0.971	1.14	0.567	1.13	1.12
Hf	21.3	19.3	9.66	11.8	5.6	13.2	22.2
Ta	4.26	4.81	1.08	1.27	0.689	1.84	1.86
W	1.89	1.34	0.33	0.56	0.56	0.66	0.96
Bi	<0.5	<0.5	<0.5	<0.5	<0.5	<0.5	<0.5
Th	11.5	9.93	2.3	4.39	1.6	5.96	5.41
U	11.3	11	1.74	3.46	1.14	4.26	3.59

## Sheet: S9 U-Pb LAICPMS
Table S9: U-Pb zircon data
The University of Bergen, Data reduction by Leif-Erik R. Pedersen.								Data for Tera-Wasserburg plot							Data for Wetherill plot									Dates
Identifier	Comments	f206c	206Pb	Uppm	Th/U	206Pb/204Pb	1s%	238U/206Pb	1s%	207Pb/206Pb	1s%	208Pb/206Pb	1s%	207Pb/235U	1s%	206Pb/238U	1s%	Rho	208Pb/232Th	1s%	207Pb/206Pb	2s (abs)	2ssys (abs)	206Pb/238U	2s (abs)	2ssys (abs)	207Pb/235U	2s (abs)	2ssys (abs)	208Pb/232Th	2s (abs)	2ssys (abs)	% conc
NP03016A
2c	small, rounded, complex zoning	1.38909	34079.1	187.686	0.619238	-59.5197	-8.92511	10.9428	0.671629	0.0587402	1.07006	0.151463	1.49254	0.751908	1.05234	0.091498	0.676591	0.216289	0.0282007	1.32655	483.308	50.9917	50.9917	563.759	7.30045	10.279	565.284	9.20709	9.98424	561.293	14.6896	25.7309	99.7301
2d	small, rounded, complex zoning	3.39699	45567.7	254.696	0.319412	-70.3856	-10.0385	10.8184	0.581961	0.0591339	0.994822	0.0885919	1.5919	0.756401	0.956533	0.0919606	0.572623	0.245971	0.0317796	1.59466	489.716	45.5184	45.5184	566.634	6.21251	9.56727	567.772	8.50802	9.37023	631.998	19.9391	31.09	99.7996
1.2	rim analyses, CL-bright	1.64888	27738.8	135.282	0.414468	-48.0141	-9.19277	9.12148	0.752607	0.0637688	1.2387	0.107468	1.93955	0.981018	1.19128	0.110668	0.745304	0.237766	0.0358954	1.79046	594.713	58.3993	58.3993	675.681	9.60297	12.9183	683.145	11.855	12.6426	709.542	24.9758	36.4966	98.9073
3b	elongate, oscillatory zoned	1.60623	55832.7	239.321	0.459075	-91.3866	-10.0897	8.60363	0.575063	0.0649036	0.976751	0.114372	1.4361	1.04631	0.898958	0.115022	0.581672	0.195607	0.0366738	1.38206	707.981	42.1258	42.1258	701.71	7.7854	11.882	721.776	9.33971	10.4049	726.67	19.7262	33.624	97.22
2b	oscillatory zoning	0.76485	65828.3	255.295	0.476621	-111.017	-12.4167	7.26427	0.768842	0.0693474	1.09792	0.11519	1.70326	1.31883	1.04189	0.136636	0.765082	0.249506	0.0418095	1.55484	869.307	47.2918	47.2918	824.717	11.8414	15.7466	849.143	11.9404	12.9677	828.83	25.5368	40.4216	97.1234
3e.1	oscillatory zoned core	1.58457	26752.2	92.4373	0.569016	-47.5914	-8.46295	6.66468	0.733516	0.0757311	1.13617	0.157108	1.84087	1.57686	1.11385	0.150061	0.733543	0.276476	0.0516576	1.5897	1002.42	48.041	48.041	900.856	12.3181	16.6901	948.112	14.1694	15.2414	1018.07	31.8957	49.8247	95.0157
1.3 start	oscillatory zoned core	-0.178594	97467.9	346.764	0.453827	-191.79	-12.076	6.44131	0.936248	0.0718175	1.20548	0.112585	1.83065	1.53596	1.13401	0.154665	0.912647	0.268091	0.0489523	1.76448	954.286	51.9221	51.9221	925.866	15.7507	19.5459	940.177	14.282	15.3258	964.288	33.1865	48.8756	98.4779
1.4	rim analyses, CL-bright	6.05648	16841.9	51.6979	0.418679	-27.2648	-9.2269	5.99291	0.842213	0.0729326	1.40537	0.103854	2.47853	1.68758	1.27291	0.17014	0.847621	0.162659	0.0514349	2.20636	841.533	62.856	62.856	1009.9	15.9123	20.2905	984.728	16.5801	17.5487	1004.57	43.3621	57.3241	102.556
3e	oscillatory zoning	0.212982	152959	452.696	0.713171	-294.321	-8.12205	5.77027	0.452211	0.0745534	0.559923	0.168611	0.770928	1.78906	0.516601	0.170837	0.450517	0.348878	0.0520482	0.721175	1034.74	22.8631	22.8631	1015.88	8.47085	15.1906	1038.94	6.72701	8.84821	1024.77	14.4169	40.7721	97.7804
1.3 end	oscillatory zoned core	0.636101	83249.5	227.687	0.474791	-136.308	-11.8598	5.66708	0.613518	0.0719812	0.933763	0.111523	1.29483	1.77353	0.856348	0.174624	0.620331	0.206213	0.0526047	1.17312	944.552	38.796	38.796	1037.4	11.9778	17.6393	1030.9	10.9987	12.3739	1036.79	23.916	45.6579	100.631
3d	elongate, oscillatory zoned	0.997783	36988.2	108.243	0.748593	-66.6773	-8.37756	5.67371	0.592589	0.0749208	1.05132	0.171612	1.28744	1.82023	0.914779	0.175068	0.594364	0.0953152	0.0508822	1.16577	994.27	43.3402	43.3402	1039.82	11.5294	17.3826	1043.79	11.9388	13.256	1002.56	22.9189	43.9544	99.6193
3a	elongate, oscillatory zoned	2.2174	16873.1	48.8467	0.663854	-29.3343	-8.52365	5.65976	0.82857	0.0770187	1.40428	0.163328	1.99762	1.89813	1.29344	0.178769	0.861111	0.16925	0.0543136	1.82281	977.508	61.1003	61.1003	1057.49	16.8549	21.3634	1057.6	17.0095	17.9728	1065.19	38.0024	55.0102	99.99
3b	elongate, oscillatory zoned	3.3529	28167.8	79.2321	0.761074	-43.6899	-9.33852	5.5538	0.634723	0.0743416	1.07477	0.182076	1.36288	1.85506	0.977079	0.179895	0.624611	0.161947	0.0544695	1.2554	968.727	45.9552	45.9552	1064.34	12.2438	17.9646	1057.03	13.2287	14.5159	1070.54	26.3154	47.8717	100.691
3.2	elongate, oscillatory zoned	1.53402	29821.1	85.9312	0.760363	-55.9409	-9.13284	5.53137	0.793781	0.0763313	1.20254	0.184474	1.58294	1.91656	1.15026	0.180957	0.795195	0.281493	0.0558668	1.55192	1025.45	49.8561	49.8561	1069.87	15.6535	20.4771	1075.82	15.1644	16.2426	1095.45	33.0936	52.4423	99.4464
1.1	oscillatory zoned overgrowth	1.19815	62485.6	161.671	0.482652	-87.5891	-14.914	5.43415	0.665581	0.0756158	1.12615	0.1192	1.63131	1.94922	1.00394	0.182333	0.670147	0.176988	0.0581144	1.59822	1038.99	46.3281	46.3281	1078.56	13.2989	18.8142	1090.65	13.5494	14.8012	1139.16	35.3993	55.1239	98.8911
4	large, prismatic, osciallatory z.	2.40201	37809.5	113.041	0.486709	-60.5417	-11.8098	5.42593	0.83749	0.0746543	1.31433	0.124402	1.95707	1.88171	1.2125	0.183032	0.870408	0.225279	0.058242	1.79665	985.544	56.4826	56.4826	1081.13	17.3143	21.8575	1064.96	16.3339	17.3826	1143.33	40.2764	58.7471	101.518
5.2	sector zoning	3.77283	22645.2	62.56	0.626036	-36.5131	-10.0403	5.19466	0.895512	0.07769	1.38118	0.153416	1.98148	2.07214	1.27903	0.194507	0.929445	0.225712	0.0580009	1.73887	1008.17	59.1298	59.1298	1142.48	19.5227	24.0741	1116.36	17.6422	18.6633	1133.98	38.368	56.9569	102.34
5.1	sector zoning	1.65774	27973	75.9992	0.613591	-46.8955	-9.51459	5.12647	0.784185	0.0757577	1.1574	0.147308	1.72814	2.04992	1.08097	0.195727	0.798047	0.279565	0.058809	1.57437	1001.17	49.1822	49.1822	1148.98	16.7845	21.924	1117.51	14.988	16.1895	1150.32	35.2201	55.3345	102.816
NP03016B
2a	rounded, complex zoning	0.88543	86004.2	647.908	0.0173194	-118.146	-15.4977	13.9154	0.759985	0.0587879	1.14203	0.0110157	5.31278	0.57772	1.06136	0.0710722	0.766198	0.254552	0.0554194	4.89296	506.454	50.7015	74.248	442.333	6.54484	8.9007	462.399	7.94785	12.6961	1068.47	101.541	101.541	95.6605
4.1	CL-dark overgrowth	2.13533	48602.6	330.875	0.306721	-65.6594	-11.6367	13.277	0.569703	0.0577481	0.891661	0.0790134	1.67468	0.604221	0.89604	0.0748819	0.573347	0.301113	0.0238273	1.57344	476.125	39.8478	67.5942	465.199	5.14188	8.15756	477.756	6.86625	12.239	475.157	14.7809	14.7809	97.3715
8c	rim analyses	1.05672	61249	431.927	0.487895	-105.815	-11.5983	12.1444	0.934445	0.0572197	1.21639	0.123255	1.6603	0.654222	1.20717	0.0824015	0.914697	0.35901	0.0259433	1.5963	446.58	54.7926	77.6593	509.922	8.96161	11.3216	508.885	9.6704	14.342	517.138	16.2864	16.2864	100.204
5	rim analyses	1.59697	40609.5	264.632	0.400858	-66.2409	-9.15292	11.9212	0.600877	0.05733	1.1144	0.101693	1.55191	0.658178	0.968022	0.0832913	0.5926	0.0895724	0.0264635	1.51102	411.825	49.9647	74.1427	515.67	5.90715	9.18941	510.083	7.85336	13.2939	526.946	15.7235	15.7235	101.095
8b	elongate, oscillatory zoned	0.977326	21865.9	105.98	0.624266	-39.6607	-18.0058	9.50237	0.744422	0.0663742	1.27518	0.164403	1.80408	0.971703	1.20349	0.10598	0.778886	0.02923	0.0341662	1.67468	707.709	57.0926	79.0679	648.222	9.57978	12.9308	679.49	12.0503	17.9015	678.448	22.472	22.472	95.3983
1c	CL-bright overgrowth	5.58112	14910.2	70.9452	0.504496	-23.053	-8.7353	8.86534	0.789317	0.0708269	1.43375	0.142414	2.1776	1.10546	1.30259	0.114061	0.773727	0.0744285	0.0382745	1.95416	791.968	65.2898	85.7792	695.2	10.251	13.8787	743.131	14.1095	20.1041	754.938	28.9345	28.9345	93.5502
7b.2	stubby, oscillatory zoned	0.961346	19835	72.5231	0.582576	-31.9728	-10.487	7.27384	0.845972	0.0696352	1.46522	0.156427	2.26851	1.33987	1.44942	0.138365	0.820147	0.228939	0.0443922	1.9997	791.032	67.3463	87.6866	833.762	12.8323	16.9338	846.119	16.9885	22.9947	874.168	34.2585	34.2585	98.5395
6	long-prismatic, oscillatory zoned	1.69234	44998.5	168.765	0.568814	-63.7676	-10.308	6.82734	0.652759	0.073083	0.962323	0.139794	1.3243	1.48257	0.920679	0.146186	0.647514	0.35167	0.0444414	1.19982	945.948	40.8363	65.997	878.75	10.6752	15.7954	913.614	11.0818	19.3925	877.076	20.5936	20.5936	96.1839
1b	long-prismatic, oscillatory zoned	1.21708	55518.1	205.516	0.486086	-81.8684	-11.9148	6.39396	0.715333	0.0739743	1.01795	0.126232	1.57034	1.58436	0.95683	0.15564	0.738385	0.295061	0.049482	1.41169	990.99	42.3712	66.1932	930.934	12.7877	17.6946	958.795	12.0069	20.4799	973.982	26.8285	26.8285	97.0942
1f	stubby, oscillatory zoned	0.743188	119894	421.364	0.435014	-161.355	-13.0132	5.96881	0.570727	0.0734829	0.742822	0.105651	1.12399	1.69451	0.720001	0.165381	0.573197	0.337614	0.0505944	1.13496	997.629	31.3141	60.2761	985.57	10.4689	16.6116	1002.71	9.08026	18.9863	996.125	22.0396	22.0396	98.2904
8a	stubby	1.17104	18420.1	60.8113	0.516793	-28.8215	-10.0603	6.11929	0.909131	0.0737508	1.41243	0.133933	2.13935	1.67766	1.33766	0.166484	0.897713	0.254338	0.0520083	1.96477	901.528	61.1793	80.8919	989.523	16.446	20.9246	980.056	17.365	24.4158	1019.03	39.1217	39.1217	100.966
1-2	elongate, sector-zoned	-0.607397	17579.6	54.653	0.490142	-31.3093	-8.33605	6.06855	0.865468	0.0776839	1.43985	0.132581	2.36952	1.77605	1.32491	0.167326	0.830556	0.173971	0.0542333	2.05031	975.29	64.1109	84.081	996.07	15.1526	19.8892	1013.73	17.3702	24.5395	1059.89	42.2157	42.2157	98.2576
1-2.3	elongate, sector-zoned	1.52277	37442.7	127.793	0.527817	-44.9118	-20.0551	5.9051	1.04097	0.0790912	1.56708	0.143585	2.21551	1.85392	1.45102	0.16843	1.04483	0.271477	0.0570816	2.19683	1109.81	65.0411	82.4725	1001.57	19.3417	23.3452	1056.4	19.6741	26.6166	1118.34	47.7864	47.7864	94.8093
1a	small, oscillatory zones	0.604695	55886.2	184.266	0.507988	-90.2302	-8.86331	5.8904	0.540959	0.0748077	0.777743	0.135712	1.1995	1.74882	0.769489	0.168495	0.542278	0.324388	0.0552964	1.14301	1016.01	32.6867	60.8687	1002.93	10.0148	16.4435	1020.62	9.95486	19.7903	1085.19	24.1213	24.1213	98.267
1-2.2	elongate, sector-zoned	4.0144	21779.6	63.1806	0.773067	-34.3476	-11.4226	5.95727	0.975367	0.0748673	1.5737	0.190063	1.98679	1.74156	1.39406	0.170095	0.925993	0.155068	0.0505519	1.76644	949.466	67.3914	85.3166	1010.11	17.2932	21.748	1012.94	18.6678	25.7283	993.622	34.264	34.264	99.7212
1d	oscillatory zoned	3.2643	19932.7	61.23	0.57753	-29.9137	-8.95403	5.68202	0.688777	0.0765048	1.23424	0.142471	1.72991	1.84935	1.09991	0.176693	0.688308	0.121794	0.0535286	1.62825	982.089	52.5463	73.9366	1046.08	13.2742	19.0179	1045.12	14.8792	23.2654	1048.36	33.2363	33.2363	100.092
1d.1	overgrowth, unzoned	0.525393	47793	142.161	0.494705	-78.3309	-9.69441	5.60085	0.59568	0.0755131	0.941227	0.117356	1.44573	1.86447	0.888035	0.177816	0.59271	0.225737	0.0524217	1.36977	1025.67	39.0513	63.9885	1053.58	11.5154	17.9119	1060.4	11.8398	21.2346	1030.07	27.5064	27.5064	99.3567
1d.2	overgrowth, unzoned	1.95155	41678.3	123.483	0.522034	-56.4448	-9.86215	5.45487	0.524761	0.0752259	0.87315	0.127917	1.2251	1.89134	0.771636	0.18214	0.534119	0.194636	0.0555918	1.18378	1008.47	36.1929	62.2463	1077.46	10.6318	17.6244	1069.06	10.4695	20.7703	1090.33	25.1299	25.1299	100.785
%conc: Concordance for ages <1500 Ma calculated (206Pb/238U)/(207Pb/235U)*100
Supplement text for further details

## Sheet: S10 Metadata
Table S10
Laboratory & Sample Preparation
Laboratory name	Department of Earth Science, University of Bergen
Sample type/mineral	Zircon
Sample preparation	Standard polished thin section
Imaging	BS and CL, Zeiss Supra55 VP, 15 kV, 1 nA, 15mm working distance
Laser ablation system
Make, Model & type	RESOlution M-50 LR with a Coherent COMPexPRO® 110 193 nm ArF excimer laser
Ablation cell & volume	Two volume
Laser wavelength	193 nm
Pulse duration	20 ns
Fluence	3 J/cm2
Repetition rate	5 Hz
Ablation duration	30 secs
Spot diameter	19 µm
Sampling mode / pattern	Static spot ablation/circular
Carrier gas	He (0.75 l/min) with small amounts of N2 (4 ml/min) mixed in before entering the ICP-MS to increase sensitivity.
Signal smoothing device	“Squid” connected between the laser and the ICP-MS
ICP-MS Instrument
Make, Model & type	Nu Instruments, Nu Attom HR, SC-ICP-MS
Sample introduction	Ablation aerosol from laser ablation
RF power	1300W
Cool gas	Ar 13 l/min
Aux gas	Ar 0.7 l/min
Make-up gas flow	Ar 0.45 l/min
Detection system	MasCom Electron Multiplier
Masses measured	202Hg, 204(Hg + Pb), 206Pb, 207Pb, 208Pb, 232Th, 238U
Integration time per peak/dwell times	200µs for 202Hg, 204(Hg + Pb), 206Pb, 208Pb, 232Th, 238U
	800 µs for 207Pb and 235U
Number of sweeps per cycle	10
Total time per cycle	0.0493 s
Analysis method	Deflector jump
IC Dead time	14 ns
Detection Mode	Ion counting mode and ion-attenuated mode
Data Processing
Gas blank	15 s
Calibration strategy	91500 (1062.4 Ma; Wiedenbeck et al., 1995) used as primary reference material, while Plesovice (337.1 Ma; Sláma et al., 2008), and GJ1 (nr. 63 – 602 Ma; Jackson et al., 2004) are used as secondaries.
Data processing package used / Correction for LIEF	Iolite4 (v. 4.8.1) for data normalization, uncertainty propagation and age calculation. LIEF correction assumes reference material and samples behave identically.
Common-Pb correction	No common-Pb correction applied to the data. Only monitored.
Data reduction	U-Pb Geochronology (Paton et al. 2011)
Down-hole correction model	Exponential + linear
Uncertainty level & propagation	Ages are quoted at 2sd absolute in the data table, propagation is by quadratic addition.
Quality control / Validation	Weighted mean ages or Concordia ages calculated with IsoplotR 5.1 (Vermeesch, 2018)
	Run 1 – NP03016A
	Plesovice – Wtd ave 206Pb/238U age = 342.37 ± 0.84 Ma (2s, MSWD = 3.1, n=10)
	GJ1 – Wtd ave 206Pb/238U age = 603.99 ± 1.82 Ma (2s, MSWD = 1.4, n=10)
	Run 2 – NP03016B
	Plesovice – Wtd ave 206Pb/238U age = 339.82 ± 1.17 Ma (2s, MSWD = 2.8, n=10)
	GJ1 – Wtd ave 206Pb/238U age = 595.87 ± 1.49 Ma (2s, MSWD = 1.5, n=10)
	All secondary reference materials are within 2% of their reported TIMS age.
Data reporting	Reported in the format of the plasmage.org data reporting template (Horstwood et al., 2016), using a python script made by Joe Petrus (https://github.com/iolite-LA-ICP-MS/iolite4-python-examples/blob/master/export/PlasmAge.py).
Data visualization	IsoplotR (Vermeesch, 2018)
Horstwood, M.S.A., Košler, J., Gehrels, G., Jackson, S.E., McLean, N.M., Paton, C., Pearson, N.J., Sircombe, K., Sylvester, P., Vermeesch, P., Bowring, J.F., Condon, D.J., and Schoene, B. Community‐derived standards for LA‐ICP‐MS U‐(Th‐) Pb geochronology–Uncertainty propagation, age interpretation and data reporting, Geostand. Geoanal. Res., 40(3), 311-332, 2016.
